**table S1: Accession numbers for influenza A virus PR/8/34 sequences during adaptation from MDCK to Vero cells and back.** The original virus seed was either purchased from the National Institute for Biological Standards and Control (NIBSC) or the Robert Koch Institute (RKI). The first virus passages, produced in MDCK cell culture (M1), served as virus seed for the first passages in Vero cells. The last of five consecutive Vero cell-derived virus passages (V5) served as seed for five consecutive MDCK cell-derived virus passages, of which M6 represents the last. All sequences were generated by pyrosequencing and deposited in the GISAID EpiFlu database ([www.gisaid.org](http://www.gisaid.org)).

| Segment_Ids | Isolate_Name                                          | Passage_History | Seq_Id (HA)                                                                    |
|-------------|-------------------------------------------------------|-----------------|--------------------------------------------------------------------------------|
| EPI304412   | A/MDCK/Germany/[A/Puerto Rico/8/1934]-RKI-M1 (H1N1)   | P5              | utf_rki-m1-ges_unambig_HA_Segment4_00001 length=1769 numreads=9121             |
| EPI304420   | A/MDCK/Germany/[A/Puerto Rico/8/1934]-RKI-V5 (H1N1)   | P10             | utf_rki-v5-ges_unambig_HA_Segment4_00001 length=1763 numreads=3748             |
| EPI304428   | A/MDCK/Germany/[A/Puerto Rico/8/1934]-RKI-M6 (H1N1)   | P15             | mutf_rki-m6-ges_unambig_HA_Segment4_00001, 1..1761 length=1760 numreads=2824   |
| EPI304436   | A/MDCK/Germany/[A/Puerto Rico/8/1934]-NIBSC-M1 (H1N1) | P4              | mutf_nibsc-m1-ges_unambig_HA_Segment4_00001 length=1762 numreads=4279          |
| EPI304444   | A/MDCK/Germany/[A/Puerto Rico/8/1934]-NIBSC-V5 (H1N1) | P9              | ctf_nibsc-v5-ges_unambig_HA_Segment4_00001 length=1760 numreads=3493           |
| EPI304452   | A/MDCK/Germany/[A/Puerto Rico/8/1934]-NIBSC-M6 (H1N1) | P14             | mutf_nibsc-m6-ges_unambig_HA_Segment4_00001, 1..1759 length=1760 numreads=8589 |
