**Table S2: Overview of relative peak heights (RPH) averages and according standard (SD) and relative standard deviations (RSD).** The average RPH and the respective SD and RSD of each peak (no. 1 - 25) within each experiment (control 1: pattern stability for ten consecutive virus passages; control 2: reproducibility in Vero or MDCK time series; adaptation series of *H1N1* from RKI and adaptation series of *H1N1* from NIBSC) are listed. The factors indicate x-fold increase (> 1) or decrease (< 1) of respective deviations observed during adaptation compared to the maximal deviation during controls. Factors of > 3 are defined as significantly influenced during adaptation and highlighted in blue bold numbers.

| Host Cell Line | Peak No. | Pattern Stability (Control 1)* |        |         | Reproducibility in Time Series (Control 2)° |        |         | max. deviation of controls |         | Adaptation Series <i>H1N1</i> (Amp. 3138, RKI)# |        |         |                       |                      | Adaptation Series <i>H1N1</i> (#06/114, NIBSC)# |        |         |                       |                      |
|----------------|----------|--------------------------------|--------|---------|---------------------------------------------|--------|---------|----------------------------|---------|-------------------------------------------------|--------|---------|-----------------------|----------------------|-------------------------------------------------|--------|---------|-----------------------|----------------------|
|                |          | RPH <sub>average</sub> [%]     | SD [%] | RSD [%] | RPH <sub>average</sub> [%]                  | SD [%] | RSD [%] | SD [%]                     | RSD [%] | RPH <sub>average</sub> [%]                      | SD [%] | RSD [%] | factor <sub>RSD</sub> | factor <sub>SD</sub> | RPH <sub>average</sub> [%]                      | SD [%] | RSD [%] | factor <sub>RSD</sub> | factor <sub>SD</sub> |
| Vero           | 5        | n.a.                           | n.a.   | n.a.    | 4.01                                        | 0.99   | 24.83   | 0.99                       | 24.83   | 4.18                                            | 1.72   | 41.21   | 1.66                  | 1.73                 | 2.92                                            | 1.65   | 56.73   | 2.29                  | 1.66                 |
|                | 7        | n.a.                           | n.a.   | n.a.    | 21.76                                       | 6.06   | 27.83   | 6.06                       | 27.83   | 22.34                                           | 8.40   | 37.62   | 1.35                  | 1.39                 | 16.77                                           | 6.29   | 37.52   | 1.35                  | 1.04                 |
|                | 8        | n.a.                           | n.a.   | n.a.    | 2.63                                        | 0.71   | 27.08   | 0.71                       | 27.08   | 5.01                                            | 1.54   | 30.79   | 1.14                  | 2.17                 | 2.28                                            | 0.48   | 20.93   | 0.77                  | 0.67                 |
|                | 11       | n.a.                           | n.a.   | n.a.    | 1.09                                        | 0.26   | 23.97   | 0.26                       | 23.97   | 1.35                                            | 1.06   | 78.51   | <b>3.28</b>           | <b>4.05</b>          | 0.50                                            | 0.30   | 59.93   | 2.50                  | 1.16                 |
|                | 14       | n.a.                           | n.a.   | n.a.    | 12.56                                       | 0.54   | 4.30    | 0.54                       | 4.30    | 8.35                                            | 2.94   | 35.23   | <b>8.19</b>           | <b>5.44</b>          | 9.99                                            | 1.91   | 19.13   | <b>4.45</b>           | <b>3.54</b>          |
|                | 15       | n.a.                           | n.a.   | n.a.    | 16.41                                       | 1.51   | 9.19    | 1.51                       | 9.19    | 14.66                                           | 2.33   | 15.89   | 1.73                  | 1.55                 | 16.42                                           | 1.40   | 8.53    | 0.93                  | 0.93                 |
|                | 16       | n.a.                           | n.a.   | n.a.    | 3.41                                        | 1.11   | 32.41   | 1.11                       | 32.41   | 4.60                                            | 1.56   | 33.98   | 1.05                  | 1.41                 | 4.18                                            | 1.06   | 25.27   | 0.78                  | 0.96                 |
|                | 17       | n.a.                           | n.a.   | n.a.    | 1.00                                        | 0.52   | 51.99   | 0.52                       | 51.99   | 1.17                                            | 0.75   | 63.93   | 1.23                  | 1.43                 | 1.08                                            | 0.28   | 26.14   | 0.50                  | 0.54                 |
|                | 18       | n.a.                           | n.a.   | n.a.    | 2.29                                        | 0.34   | 15.04   | 0.34                       | 15.04   | 2.26                                            | 1.52   | 66.98   | <b>4.45</b>           | <b>4.41</b>          | 1.71                                            | 0.40   | 23.47   | 1.56                  | 1.17                 |
|                | 19       | n.a.                           | n.a.   | n.a.    | 1.79                                        | 0.14   | 7.76    | 0.14                       | 7.76    | 2.09                                            | 0.27   | 12.73   | 1.64                  | 1.92                 | 2.88                                            | 1.03   | 35.90   | <b>4.63</b>           | <b>7.45</b>          |
|                | 20       | n.a.                           | n.a.   | n.a.    | 9.57                                        | 1.81   | 18.93   | 1.81                       | 18.93   | 6.85                                            | 2.18   | 31.81   | 1.68                  | 1.20                 | 9.53                                            | 1.78   | 18.63   | 0.98                  | 0.98                 |
|                | 21       | n.a.                           | n.a.   | n.a.    | 13.00                                       | 1.53   | 11.75   | 1.53                       | 11.75   | 12.72                                           | 3.06   | 24.08   | 2.05                  | 2.01                 | 15.27                                           | 1.34   | 8.80    | 0.75                  | 0.88                 |
|                | 22       | n.a.                           | n.a.   | n.a.    | 3.24                                        | 0.92   | 28.33   | 0.92                       | 28.33   | 4.49                                            | 0.36   | 8.02    | 0.28                  | 0.39                 | 3.78                                            | 0.58   | 15.37   | 0.54                  | 0.63                 |
|                | 23       | n.a.                           | n.a.   | n.a.    | 3.74                                        | 1.34   | 35.77   | 1.34                       | 35.77   | 4.27                                            | 1.89   | 44.33   | 1.24                  | 1.41                 | 4.83                                            | 0.54   | 11.20   | 0.31                  | 0.40                 |
|                | 24       | n.a.                           | n.a.   | n.a.    | 1.66                                        | 0.77   | 46.51   | 0.77                       | 46.51   | 2.19                                            | 0.61   | 27.90   | 0.60                  | 0.79                 | 3.34                                            | 0.65   | 19.33   | 0.42                  | 0.84                 |
| 25             | n.a.     | n.a.                           | n.a.   | 1.83    | 0.95                                        | 51.96  | 0.95    | 51.96                      | 3.47    | 1.96                                            | 56.43  | 1.09    | 2.06                  | 4.52                 | 0.76                                            | 16.74  | 0.32    | 0.80                  |                      |
| MDCK           | 1        | 1.62                           | 0.25   | 15.50   | 1.55                                        | 0.24   | 15.75   | 0.25                       | 15.75   | 0.93                                            | 0.18   | 19.14   | 1.22                  | 0.71                 | 0.85                                            | 0.26   | 30.39   | 1.93                  | 1.03                 |
|                | 2        | 11.73                          | 0.75   | 6.37    | 10.45                                       | 0.57   | 5.48    | 0.75                       | 6.37    | 10.29                                           | 1.68   | 16.31   | 2.56                  | 2.25                 | 6.76                                            | 1.49   | 22.09   | <b>3.47</b>           | 2.00                 |
|                | 3        | 6.45                           | 0.40   | 6.14    | 5.66                                        | 0.03   | 0.59    | 0.40                       | 6.14    | 3.42                                            | 0.47   | 13.83   | 2.25                  | 1.19                 | 3.57                                            | 0.30   | 8.44    | 1.38                  | 0.76                 |
|                | 4        | 6.55                           | 0.41   | 6.20    | 6.48                                        | 0.53   | 8.13    | 0.53                       | 8.13    | 6.69                                            | 1.14   | 17.00   | 2.09                  | 2.16                 | 4.21                                            | 0.71   | 16.90   | 2.08                  | 1.35                 |
|                | 6        | 9.24                           | 0.40   | 4.37    | 9.56                                        | 0.57   | 6.00    | 0.57                       | 6.00    | 12.13                                           | 1.83   | 15.13   | 2.52                  | <b>3.20</b>          | 14.64                                           | 2.90   | 19.79   | <b>3.30</b>           | <b>5.05</b>          |
|                | 7        | 3.47                           | 0.28   | 8.16    | 3.72                                        | 0.01   | 0.30    | 0.28                       | 8.16    | 2.89                                            | 0.59   | 20.43   | 2.50                  | 2.09                 | 3.88                                            | 2.03   | 52.29   | <b>6.41</b>           | <b>7.16</b>          |
|                | 8        | 8.21                           | 0.34   | 4.16    | 8.40                                        | 0.03   | 0.33    | 0.34                       | 4.16    | 6.75                                            | 0.26   | 3.89    | 0.94                  | 0.77                 | 5.13                                            | 0.37   | 7.15    | 1.72                  | 1.07                 |
|                | 9        | 1.65                           | 0.38   | 22.91   | 2.22                                        | 0.19   | 8.72    | 0.38                       | 22.91   | 2.31                                            | 0.46   | 19.71   | 0.86                  | 1.20                 | 3.47                                            | 0.41   | 11.80   | 0.52                  | 1.08                 |
|                | 10       | 9.84                           | 0.61   | 6.24    | 9.89                                        | 0.10   | 1.03    | 0.61                       | 6.24    | 12.21                                           | 0.92   | 7.56    | 1.21                  | 1.50                 | 13.02                                           | 2.80   | 21.53   | <b>3.45</b>           | <b>4.57</b>          |
|                | 11       | 7.63                           | 0.40   | 5.20    | 7.20                                        | 0.24   | 3.32    | 0.40                       | 5.20    | 5.45                                            | 0.58   | 10.60   | 2.04                  | 1.46                 | 5.96                                            | 1.04   | 17.44   | <b>3.35</b>           | 2.62                 |
|                | 12       | 6.92                           | 0.53   | 7.65    | 7.04                                        | 0.09   | 1.27    | 0.53                       | 7.65    | 13.02                                           | 1.45   | 11.16   | 1.46                  | 2.74                 | 10.74                                           | 1.24   | 11.57   | 1.51                  | 2.35                 |
|                | 13       | 7.30                           | 0.52   | 7.15    | 7.92                                        | 0.53   | 6.69    | 0.53                       | 7.15    | 5.87                                            | 1.23   | 20.88   | 2.92                  | 2.31                 | 6.26                                            | 1.66   | 26.48   | <b>3.71</b>           | <b>3.12</b>          |
|                | 14       | 1.36                           | 0.32   | 23.64   | 1.56                                        | 0.06   | 3.79    | 0.32                       | 23.64   | 3.08                                            | 0.99   | 32.01   | 1.35                  | <b>3.07</b>          | 3.86                                            | 2.05   | 53.22   | 2.25                  | <b>6.38</b>          |
|                | 15       | 15.69                          | 1.14   | 7.28    | 14.90                                       | 2.34   | 15.69   | 2.34                       | 15.69   | 11.27                                           | 3.18   | 28.22   | 1.80                  | 1.36                 | 12.28                                           | 3.85   | 31.32   | 2.00                  | 1.64                 |
|                | 16       | 2.33                           | 0.51   | 21.69   | 3.46                                        | 0.82   | 23.69   | 0.82                       | 23.69   | 3.68                                            | 1.32   | 35.73   | 1.51                  | 1.61                 | 5.36                                            | 1.14   | 21.26   | 0.90                  | 1.39                 |

\* n = 10

° n = 4 (Vero); n = 2 (MDCK)

# n = 5 (Vero); n = 6 (MDCK)
